# Supplementary material
Source: MDPI journal article supplement (https://www.mdpi.com/1424-8247/15/5/611)
Supplement: s1 [file s1]

## Supplementary Data

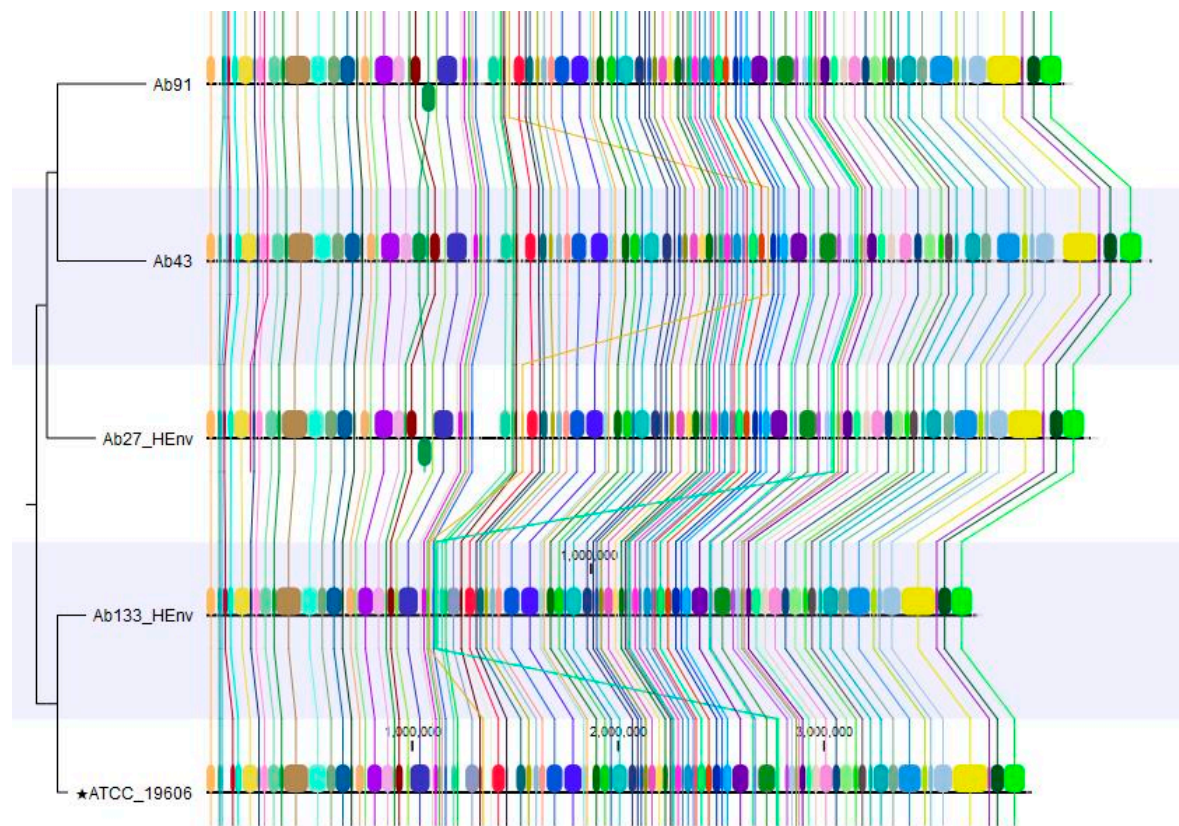

**Figure S1.** The synteny map is showing whole genome alignment of the *Acinetobacter baumannii* from this study with a reference isolate genome of *A. baumannii* ATCC 19606.

**Table S1.** Percentage distribution of bacterial community in the different units of the hospital.

| <b>Species</b>                         | <b>MICU</b> | <b>NICU</b> | <b>SICU</b> | <b>OncW</b> |
|----------------------------------------|-------------|-------------|-------------|-------------|
| <i>Achromobacter xylosoxidans</i>      | 2.39521     |             |             |             |
| <i>Acinetobacter baumannii</i>         | 1.197605    | 9.756098    |             |             |
| <i>Acinetobacter junii</i>             |             |             |             | 1.234568    |
| <i>Acinetobacter</i> sp.               |             |             |             | 1.234568    |
| <i>Actinomyces johnsonii</i>           |             |             |             | 1.234568    |
| <i>Arthrobacter enclensis</i>          |             | 21.95122    | 19.44444    | 13.58025    |
| <i>Arthrobacter liuii</i>              |             |             | 9.722222    |             |
| <i>Arthrobacter pascens</i>            |             | 2.439024    |             |             |
| <i>Bacillus badius</i>                 | 0.598802    |             |             |             |
| <i>Bacillus glycinifermentans</i>      |             |             |             | 2.469136    |
| <i>Bacillus licheniformis</i>          | 2.994012    |             |             |             |
| <i>Bacillus megaterium</i>             | 0.598802    |             |             |             |
| <i>Bacillus niacini</i>                |             | 2.439024    |             |             |
| <i>Bacillus paralicheniformis</i>      |             |             | 5.555556    | 3.703704    |
| <i>Bacillus pumilus</i>                | 1.796407    |             |             |             |
| <i>Bacillus simplex</i>                | 0.598802    |             |             |             |
| <i>Bacillus</i> sp.                    | 3.592814    | 7.317073    | 2.777778    |             |
| <i>Burkholderia cepacia</i>            |             | 7.317073    |             |             |
| <i>Carnobacterium maltaromaticum</i>   |             |             |             | 2.469136    |
| <i>Cellulomonas flavigena</i>          |             |             | 5.555556    | 3.703704    |
| <i>Cellvibrio vulgaris</i>             |             |             |             | 1.234568    |
| <i>Chryseobacterium taihuense</i>      |             |             |             | 1.234568    |
| <i>Clavibacter michiganensis</i>       |             |             |             | 1.234568    |
| <i>Corynebacterium aurimucosum</i>     | 1.197605    |             |             |             |
| <i>Corynebacterium mucifaciens</i>     |             |             | 2.777778    |             |
| <i>Dermabacter hominis</i>             | 2.39521     |             | 1.388889    |             |
| <i>Dermaococcus nishinomiyaensis</i>   | 0.598802    |             |             | 1.234568    |
| <i>Elizabethkingia meningoseptica</i>  | 1.197605    |             | 1.388889    |             |
| <i>Enterococcus casseliflavus</i>      |             | 2.439024    |             |             |
| <i>Enterococcus faecium</i>            |             |             | 1.388889    |             |
| <i>Geobacillus thermoglucosidasius</i> | 0.598802    |             |             |             |
| <i>Klebsiella pneumoniae</i>           | 7.185629    |             |             |             |
| <i>Kytococcus sedentarius</i>          | 1.796407    |             |             |             |
| <i>Listeria welshimeri</i>             |             |             | 2.777778    |             |
| <i>Microbacterium ginsengisoli</i>     |             |             |             | 2.469136    |
| <i>Microbacterium testaceum</i>        |             |             |             | 1.234568    |
| <i>Micrococcus luteus</i>              | 13.17365    | 17.07317    | 11.11111    | 12.34568    |
| <i>Moraxella osloensis</i>             |             | 2.439024    | 1.388889    |             |
| <i>Mycobacterium avium</i>             |             |             |             | 1.234568    |
| <i>Oligella urethralis</i>             | 1.197605    |             |             |             |

|                                           |          |          |          |          |
|-------------------------------------------|----------|----------|----------|----------|
| <i>Ornithinibacillus composti</i>         |          |          |          | 1.234568 |
| <i>Paenibacillus durus</i>                |          |          | 1.388889 |          |
| <i>Paenibacillus pabuli</i>               | 1.197605 |          |          |          |
| <i>Paenibacillus species</i>              | 0.598802 |          |          |          |
| <i>Propionibacterium avidum</i>           |          |          | 1.388889 | 1.234568 |
| <i>Proteus vulgaris</i>                   | 1.197605 |          |          |          |
| <i>Pseudarthrobacter chlorophenolicus</i> |          | 2.439024 | 1.388889 | 2.469136 |
| <i>Pseudomonas aeruginosa</i>             | 3.592814 |          | 5.555556 |          |
| <i>Pseudomonas chlororaphis</i>           |          | 2.439024 |          |          |
| <i>Pseudomonas fluorescens</i>            |          | 4.878049 |          |          |
| <i>Pseudomonas luteola</i>                | 2.39521  |          |          |          |
| <i>Pseudomonas oryzihabitans</i>          |          | 2.439024 |          |          |
| <i>Pseudomonas stutzeri</i>               | 3.592814 | 2.439024 |          | 1.234568 |
| <i>Pseudomonas xanthomarina</i>           |          |          |          | 2.469136 |
| <i>Rothia kristinae</i>                   | 1.197605 |          |          |          |
| <i>Sphingobacterium spiritivorum</i>      |          |          |          | 1.234568 |
| <i>Staphylococcus aureus</i>              | 2.994012 |          |          |          |
| <i>Staphylococcus capitis</i>             | 7.185629 | 2.439024 | 1.388889 | 3.703704 |
| <i>Staphylococcus cohnii</i>              |          |          |          | 1.234568 |
| <i>Staphylococcus epidermidis</i>         | 17.36527 |          | 5.555556 | 8.641975 |
| <i>Staphylococcus haemolyticus</i>        | 9.580838 |          | 2.777778 | 13.58025 |
| <i>Staphylococcus hominis</i>             | 2.994012 | 7.317073 | 2.777778 |          |
| <i>Staphylococcus lentus</i>              | 0.598802 |          |          |          |
| <i>Staphylococcus lugdunensis</i>         |          |          |          | 2.469136 |
| <i>Staphylococcus saprophyticus</i>       |          |          |          | 2.469136 |
| <i>Staphylococcus warneri</i>             | 0.598802 | 2.439024 | 2.777778 | 2.469136 |
| <i>Stenotrophomonas maltophilia</i>       | 1.796407 |          | 6.944444 | 1.234568 |
| <i>Streptococcus agalactiae</i>           |          |          | 1.388889 |          |
| <i>Streptococcus australis</i>            |          |          |          | 2.469136 |
| <i>Streptococcus salivarius</i>           |          |          | 1.388889 |          |

MICU, medical intensive care unit; NICU, neonatal intensive care unit; SICU, surgical intensive care unit; OncW, oncology ward.

**Table S2.** Description of the *Acinetobacter baumannii* genomes analyzed in this study.

| Accession No.   | Strains    | Isolation Source    | Geographic Location | Genome Source |
|-----------------|------------|---------------------|---------------------|---------------|
| GCA_021725575.1 | Ab27-HEnv  | Bed rail            | Saudi Arabia        | This study    |
| GCA_021726495.1 | Ab133-HEnv | Nurses station desk | This study          | This study    |
| GCA_021726525.1 | Ab43       | Bronchial wash      | This study          | This study    |
| GCA_021725595.1 | Ab91       | Wound               | This study          | This study    |
| GCA_002245665.1 | Ab15       | Bedside table       | Brazil              | GenBank       |
| GCA_002760765.1 | MBL_M5     | Urine               | Tunisia             | GenBank       |
| GCA_002760845.1 | MBL_M9     | Urine               | Tunisia             | GenBank       |
| GCA_012524275.1 | Ab376      | Catheter            | Argentina           | GenBank       |
| GCA_020101315.1 | DETAB-E405 | Bed controller      | China               | GenBank       |
| GCA_020101595.1 | DETAB-E422 | Stethoscope         | China               | GenBank       |
| GCA_020101775.1 | DETAB-E44  | Nebuliser           | China               | GenBank       |
| GCA_020101795.1 | DETAB-E52  | Dispensing trolley  | China               | GenBank       |
| GCA_020101815.1 | DETAB-E47  | Bedside table       | China               | GenBank       |
| GCA_020101835.1 | DETAB-E45  | Bed controller      | China               | GenBank       |
| GCA_020101875.1 | DETAB-E55  | Bed rail            | China               | GenBank       |
| GCA_020101935.1 | DETAB-E57  | Nebuliser           | China               | GenBank       |
| GCA_020102055.1 | DETAB-E67  | Bed rail            | China               | GenBank       |
| GCA_020102315.1 | DETAB-E88  | Infusion stand      | China               | GenBank       |
| GCA_020102355.1 | DETAB-E93  | Bed rail            | China               | GenBank       |
| GCA_020102395.1 | DETAB-E90  | Stethoscope         | China               | GenBank       |
| GCA_020102415.1 | DETAB-E87  | Ventilator shelf    | China               | GenBank       |
| GCA_020102555   | DETAB-E1   | Ventilator          | China               | GenBank       |
| GCA_020102615.1 | DETAB-E100 | Bed rail            | China               | GenBank       |
| GCA_020102635.1 | DETAB-E103 | Bed rail            | China               | GenBank       |
| GCA_020102715.1 | DETAB-E107 | Bed controller      | China               | GenBank       |
| GCA_020102755.1 | DETAB-E113 | Bed rail            | China               | GenBank       |
| GCA_020102935.1 | DETAB-E124 | Bedside table       | China               | GenBank       |
| GCA_020102995.1 | DETAB-E115 | ECG monitor         | China               | GenBank       |
| GCA_020103075.1 | DETAB-E116 | Stethoscope         | China               | GenBank       |
| GCA_020103215.1 | DETAB-E14  | Bed controller      | China               | GenBank       |
| GCA_020103455.1 | DETAB-E145 | Ventilator          | China               | GenBank       |
| GCA_020103655.1 | DETAB-E158 | Ventilator          | China               | GenBank       |
| GCA_020103835.1 | DETAB-E162 | Bed rail            | China               | GenBank       |
| GCA_020103895.1 | DETAB-E160 | Bed rail            | China               | GenBank       |
| GCA_020103915.1 | DETAB-E167 | Bed controller      | China               | GenBank       |
| GCA_020103935.1 | DETAB-E165 | Bed controller      | China               | GenBank       |
| GCA_020104255.1 | DETAB-E190 | Bed rail            | China               | GenBank       |
| GCA_020104975.1 | DETAB-E227 | Crash trolley       | China               | GenBank       |
| GCA_020105275.1 | DETAB-E246 | Ventilator shelf    | China               | GenBank       |
| GCA_020105435.1 | DETAB-E247 | Infusion stand      | China               | GenBank       |
| GCA_020105835.1 | DETAB-E274 | Locker              | China               | GenBank       |
| GCA_020105975.1 | DETAB-E29  | Bed controller      | China               | GenBank       |

|                 |            |                      |                |         |
|-----------------|------------|----------------------|----------------|---------|
| GCA_020106075.1 | DETAB-E281 | Tap surface          | China          | GenBank |
| GCA_020106275.1 | DETAB-E31  | Ventilator           | China          | GenBank |
| GCA_020106295.1 | DETAB-E302 | Bedside table        | China          | GenBank |
| GCA_020106415.1 | DETAB-E4   | Bed rail             | China          | GenBank |
| GCA_020106515.1 | DETAB-E309 | Sink countertop      | China          | GenBank |
| GCA_020106535.1 | DETAB-E310 | Bed rail             | China          | GenBank |
| GCA_020106845.1 | DETAB-E337 | Switch button        | China          | GenBank |
| GCA_020107095.1 | DETAB-E342 | Bedside table        | China          | GenBank |
| GCA_020107135.1 | DETAB-E339 | Ventilator           | China          | GenBank |
| GCA_020107555.1 | DETAB-E364 | Switch button        | China          | GenBank |
| GCA_020108075.1 | DETAB-E5   | Infusion stand       | China          | GenBank |
| GCA_020108135.1 | DETAB-E400 | Bed controller       | China          | GenBank |
| GCA_020108155.1 | DETAB-E171 | Bed rail             | China          | GenBank |
| GCA_020108555.1 | DETAB-E71  | Bed rail             | China          | GenBank |
| GCA_020109495.1 | DETAB-E425 | Sink countertop      | China          | GenBank |
| GCA_020109615.1 | DETAB-E157 | Bed rail             | China          | GenBank |
| GCA_020109735.1 | DETAB-E187 | Bed controller       | China          | GenBank |
| GCA_020109835.1 | DETAB-E32  | Dispensing trolley   | China          | GenBank |
| GCA_020110475.1 | DETAB-E123 | Ventilator shelf     | China          | GenBank |
| GCA_020110515.1 | DETAB-E128 | Bed controller       | China          | GenBank |
| GCA_020110955.1 | DETAB-E40  | ECG monitor          | China          | GenBank |
| GCA_020110975.1 | DETAB-E41  | Computer             | China          | GenBank |
| GCA_020111875.1 | DETAB-E299 | Ventilator shelf     | China          | GenBank |
| GCA_020111935.1 | DETAB-E382 | Inside sink drain    | China          | GenBank |
| GCA_020112215.1 | DETAB-E81  | Bed rail             | China          | GenBank |
| GCA_020112895.1 | DETAB-E112 | Bed controller       | China          | GenBank |
| GCA_020113755.1 | DETAB-E117 | Bed controller       | China          | GenBank |
| GCA_020113775.1 | DETAB-E327 | Bed rail             | China          | GenBank |
| GCA_020114155.1 | DETAB-E236 | Syringe driver       | China          | GenBank |
| GCA_900117405.1 | ABE12_M    | Hospital floor       | Morocco        | GenBank |
| GCA_900119395.1 | ABE8_07    | Hospital floor       | Morocco        | GenBank |
| GCA_016538365.2 | MRSN11835  | Tissue               | USA            | GenBank |
| GCF_001640065.1 | AB217      | Wound swab           | Saudi Arabia   | GenBank |
| GCF_001640075.1 | AB250      | Sputum               | Saudi Arabia   | GenBank |
| GCF_002212105.1 | AB552      | Blood                | Saudi Arabia   | GenBank |
| SAMEA5593850    | Ab174      | Catheter             | Saudi Arabia   | GenBank |
| GCA_009035845.1 | ATCC-19606 | Urine                | USA            | GenBank |
| GCF_008632635   | K09-14     | Soil                 | Malaysia       | GenBank |
| GCA_000981405.1 | Ab1        | Hospital environment | Not Applicable | GenBank |

**Table S3.** List of insertion sequences on the specific beta-lactamase resistance genes carrying contigs in the *Acinetobacter baumannii* genomes assemblies.

| Genomes<br>accession No. | Strains    | OXA-23 contig                        |                | OXA-66 contig                        |                | ADC-25 contig                        |                 |
|--------------------------|------------|--------------------------------------|----------------|--------------------------------------|----------------|--------------------------------------|-----------------|
|                          |            | <i>bla</i> <sub>OXA-23</sub><br>gene | IS             | <i>bla</i> <sub>OXA-66</sub><br>gene | IS             | <i>bla</i> <sub>ADC-25</sub><br>gene | IS              |
| GCA_021725575.1          | Ab27-HEnv  | +                                    | IS <i>Aba1</i> | +                                    | -              | +                                    | IS <i>Aba1</i>  |
| GCA_021726495.1          | Ab133-HEnv | -                                    | -              | -                                    | -              | +                                    | -               |
| GCA_021726525.1          | Ab43       | +                                    | IS <i>Aba1</i> | +                                    | -              | +                                    | IS <i>Aba1</i>  |
| GCA_021725595.1          | Ab91       | +                                    | IS <i>Aba1</i> | +                                    | -              | +                                    | IS <i>Aba26</i> |
| GCA_002245665.1          | Ab15       | +                                    | IS <i>Aba1</i> | -                                    | -              | +                                    | IS <i>Aba1</i>  |
| GCA_002760765.1          | MBL_M5     | +                                    | -              | -                                    | -              | -                                    | -               |
| GCA_002760845.1          | MBL_M9     | -                                    | -              | -                                    | -              | +                                    | -               |
| GCA_012524275.1          | Ab376      | +                                    | IS <i>Aba1</i> | -                                    | -              | +                                    | IS <i>Aba1</i>  |
| GCA_020101315.1          | DETAB-E405 | +                                    | IS <i>Aba1</i> | +                                    | IS <i>Aba1</i> | +                                    | IS <i>Aba1</i>  |
| GCA_020101595.1          | DETAB-E422 | +                                    | IS <i>Aba1</i> | +                                    | -              | +                                    | IS <i>Aba1</i>  |
| GCA_020101775.1          | DETAB-E44  | +                                    | IS <i>Aba1</i> | +                                    | -              | +                                    | IS <i>Aba1</i>  |
| GCA_020101795.1          | DETAB-E52  | +                                    | IS <i>Aba1</i> | +                                    | -              | +                                    | IS <i>Aba1</i>  |
| GCA_020101815.1          | DETAB-E47  | +                                    | IS <i>Aba1</i> | +                                    | -              | +                                    | IS <i>Aba1</i>  |
| GCA_020101835.1          | DETAB-E45  | +                                    | IS <i>Aba1</i> | +                                    | -              | +                                    | IS <i>Aba1</i>  |
| GCA_020101875.1          | DETAB-E55  | +                                    | IS <i>Aba1</i> | +                                    | -              | +                                    | IS <i>Aba1</i>  |
| GCA_020101935.1          | DETAB-E57  | +                                    | IS <i>Aba1</i> | +                                    | -              | +                                    | IS <i>Aba1</i>  |
| GCA_020102055.1          | DETAB-E67  | +                                    | IS <i>Aba1</i> | +                                    | -              | +                                    | IS <i>Aba1</i>  |
| GCA_020102315.1          | DETAB-E88  | +                                    | IS <i>Aba1</i> | +                                    | -              | +                                    | IS <i>Aba1</i>  |
| GCA_020102355.1          | DETAB-E93  | +                                    | IS <i>Aba1</i> | +                                    | -              | +                                    | IS <i>Aba1</i>  |
| GCA_020102395.1          | DETAB-E90  | +                                    | IS <i>Aba1</i> | +                                    | -              | +                                    | IS <i>Aba1</i>  |
| GCA_020102415.1          | DETAB-E87  | +                                    | IS <i>Aba1</i> | +                                    | -              | +                                    | IS <i>Aba1</i>  |
| GCA_020102555            | DETAB-E1   | +                                    | IS <i>Aba1</i> | +                                    | -              | +                                    | IS <i>Aba1</i>  |
| GCA_020102615.1          | DETAB-E100 | +                                    | IS <i>Aba1</i> | +                                    | -              | +                                    | IS <i>Aba1</i>  |
| GCA_020102635.1          | DETAB-E103 | +                                    | IS <i>Aba1</i> | +                                    | -              | +                                    | IS <i>Aba1</i>  |
| GCA_020102715.1          | DETAB-E107 | +                                    | IS <i>Aba1</i> | +                                    | -              | +                                    | IS <i>Aba1</i>  |
| GCA_020102755.1          | DETAB-E113 | +                                    | IS <i>Aba1</i> | +                                    | -              | +                                    | IS <i>Aba1</i>  |
| GCA_020102935.1          | DETAB-E124 | +                                    | IS <i>Aba1</i> | +                                    | -              | +                                    | IS <i>Aba1</i>  |
| GCA_020102995.1          | DETAB-E115 | +                                    | IS <i>Aba1</i> | +                                    | -              | +                                    | IS <i>Aba1</i>  |
| GCA_020103075.1          | DETAB-E116 | +                                    | IS <i>Aba1</i> | +                                    | -              | +                                    | IS <i>Aba1</i>  |
| GCA_020103215.1          | DETAB-E14  | +                                    | IS <i>Aba1</i> | +                                    | -              | +                                    | IS <i>Aba1</i>  |
| GCA_020103455.1          | DETAB-E145 | +                                    | IS <i>Aba1</i> | +                                    | -              | +                                    | IS <i>Aba1</i>  |
| GCA_020103655.1          | DETAB-E158 | +                                    | IS <i>Aba1</i> | +                                    | -              | +                                    | IS <i>Aba1</i>  |
| GCA_020103835.1          | DETAB-E162 | +                                    | IS <i>Aba1</i> | +                                    | -              | +                                    | IS <i>Aba1</i>  |
| GCA_020103895.1          | DETAB-E160 | +                                    | IS <i>Aba1</i> | +                                    | -              | +                                    | IS <i>Aba1</i>  |
| GCA_020103915.1          | DETAB-E167 | +                                    | IS <i>Aba1</i> | +                                    | -              | +                                    | IS <i>Aba1</i>  |
| GCA_020103935.1          | DETAB-E165 | +                                    | IS <i>Aba1</i> | +                                    | -              | +                                    | IS <i>Aba1</i>  |

|                 |            |   |                 |   |   |   |                  |
|-----------------|------------|---|-----------------|---|---|---|------------------|
| GCA_020104255.1 | DETAB-E190 | + | ISAb $\alpha$ 1 | + | - | + | ISAb $\alpha$ 1  |
| GCA_020104975.1 | DETAB-E227 | + | ISAb $\alpha$ 1 | + | - | + | ISAb $\alpha$ 1  |
| GCA_020105275.1 | DETAB-E246 | + | ISAb $\alpha$ 1 | + | - | + | ISAb $\alpha$ 1  |
| GCA_020105435.1 | DETAB-E247 | + | ISAb $\alpha$ 1 | + | - | + | ISAb $\alpha$ 1  |
| GCA_020105835.1 | DETAB-E274 | + | ISAb $\alpha$ 1 | + | - | + | ISAb $\alpha$ 1  |
| GCA_020105975.1 | DETAB-E29  | + | ISAb $\alpha$ 1 | + | - | + | ISAb $\alpha$ 1  |
| GCA_020106075.1 | DETAB-E281 | + | ISAb $\alpha$ 1 | + | - | + | ISAb $\alpha$ 1  |
| GCA_020106275.1 | DETAB-E31  | + | ISAb $\alpha$ 1 | + | - | + | ISAb $\alpha$ 1  |
| GCA_020106295.1 | DETAB-E302 | + | ISAb $\alpha$ 1 | + | - | + | ISAb $\alpha$ 1  |
| GCA_020106415.1 | DETAB-E4   | + | ISAb $\alpha$ 1 | + | - | + | ISAb $\alpha$ 1  |
| GCA_020106515.1 | DETAB-E309 | + | ISAb $\alpha$ 1 | + | - | + | -                |
| GCA_020106535.1 | DETAB-E310 | + | ISAb $\alpha$ 1 | + | - | + | -                |
| GCA_020106845.1 | DETAB-E337 | + | ISAb $\alpha$ 1 | + | - | + | ISAb $\alpha$ 1  |
| GCA_020107095.1 | DETAB-E342 | + | ISAb $\alpha$ 1 | + | - | + | ISAb $\alpha$ 1  |
| GCA_020107135.1 | DETAB-E339 | + | ISAb $\alpha$ 1 | + | - | + | ISAb $\alpha$ 1  |
| GCA_020107555.1 | DETAB-E364 | + | ISAb $\alpha$ 1 | + | - | + | ISAb $\alpha$ 1  |
| GCA_020108075.1 | DETAB-E5   | + | ISAb $\alpha$ 1 | + | - | + | ISAb $\alpha$ 1  |
| GCA_020108135.1 | DETAB-E400 | + | ISAb $\alpha$ 1 | + | - | + | ISAb $\alpha$ 1  |
| GCA_020108155.1 | DETAB-E171 | + | ISAb $\alpha$ 1 | + | - | + | ISAb $\alpha$ 1  |
| GCA_020108555.1 | DETAB-E71  | + | ISAb $\alpha$ 1 | + | - | + | ISAb $\alpha$ 1  |
| GCA_020109495.1 | DETAB-E425 | + | ISAb $\alpha$ 1 | + | - | + | ISAb $\alpha$ 1  |
| GCA_020109615.1 | DETAB-E157 | + | ISAb $\alpha$ 1 | + | - | + | ISAb $\alpha$ 1  |
| GCA_020109735.1 | DETAB-E187 | + | ISAb $\alpha$ 1 | + | - | + | ISAb $\alpha$ 1  |
| GCA_020109835.1 | DETAB-E32  | + | ISAb $\alpha$ 1 | + | - | + | ISAb $\alpha$ 1  |
| GCA_020110475.1 | DETAB-E123 | + | ISAb $\alpha$ 1 | + | - | + | ISAb $\alpha$ 1  |
| GCA_020110515.1 | DETAB-E128 | + | ISAb $\alpha$ 1 | + | - | + | ISAb $\alpha$ 1  |
| GCA_020110955.1 | DETAB-E40  | + | ISAb $\alpha$ 1 | + | - | + | ISAb $\alpha$ 1  |
| GCA_020110975.1 | DETAB-E41  | + | ISAb $\alpha$ 1 | + | - | + | ISAb $\alpha$ 1  |
| GCA_020111875.1 | DETAB-E299 | + | ISAb $\alpha$ 1 | + | - | + | ISAb $\alpha$ 1  |
| GCA_020111935.1 | DETAB-E382 | + | ISAb $\alpha$ 1 | + | - | + | ISAb $\alpha$ 1  |
| GCA_020112215.1 | DETAB-E81  | + | ISAb $\alpha$ 1 | + | - | + | ISAb $\alpha$ 1  |
| GCA_020112895.1 | DETAB-E112 | + | ISAb $\alpha$ 1 | + | - | + | ISAb $\alpha$ 1  |
| GCA_020113755.1 | DETAB-E117 | + | ISAb $\alpha$ 1 | + | - | + | ISAb $\alpha$ 1  |
| GCA_020113775.1 | DETAB-E327 | + | ISAb $\alpha$ 1 | + | - | + | ISAb $\alpha$ 1  |
| GCA_020114155.1 | DETAB-E236 | + | ISAb $\alpha$ 1 | + | - | + | ISAb $\alpha$ 1  |
| GCA_900117405.1 | ABE12_M    | + | -               | + | - | + | ISAb $\alpha$ 1  |
| GCA_900119395.1 | ABE8_07    | + | -               | + | - | + | ISAb $\alpha$ 26 |
| GCA_016538365.2 | MRSN11835  | + | ISAb $\alpha$ 1 | - | - | + | ISAb $\alpha$ 1  |
| GCF_001640065.1 | AB217      | + | ISAb $\alpha$ 1 | + | - | + | ISAb $\alpha$ 1  |
| GCF_001640075.1 | AB250      | + | ISAb $\alpha$ 1 | + | - | + | ISAb $\alpha$ 1  |
| GCF_002212105.1 | AB552      | - | -               | + | - | + | ISAb $\alpha$ 1  |

|                 |            |   |   |   |   |   |              |
|-----------------|------------|---|---|---|---|---|--------------|
| SAMEA5593850    | Ab174      | - | - | - | - | + | -            |
| GCA_009035845.1 | ATCC-19606 | - | - | - | - | + | -            |
| GCF_008632635   | K09-14     | - | - | - | - | + | -            |
| GCA_000981405.1 | Ab1        | - | - | - | - | + | <i>ISAb1</i> |

IS, insertion sequences; detected (+); not detected (-).



**Table S4.** List of antibiotics disk used against Gram-negative and Gram-positive isolates for antibiotic susceptibility screening.

| <b>Gram-negative Bacteria</b>               | <b>Gram-positive Bacteria</b>               |
|---------------------------------------------|---------------------------------------------|
| Ampicillin 10 µg                            | Benzylpenicillin 10 units                   |
| Amoxicillin/Clavulanic acid 20/10 µg        | Ampicillin 10 µg                            |
| Piperacillin/Tazobactam 100/10 µg           | Azithromycin 15 µg                          |
| Cefazolin 30 ug                             | Vancomycin 30 µg                            |
| Azithromycin 15 µg                          | Ciprofloxacin 5 µg                          |
| Levofloxacin 5 µg                           | Clindamycin 2 µg                            |
| Cefepime 30 µg                              | Erythromycin 15 µg                          |
| Imipenem 10 µg                              | Tetracycline 30 µg                          |
| Meropenem 10 µg                             | Imipenem 10 µg                              |
| Gentamicin 10 µg                            | Gentamicin 10 µg                            |
| Amikacin 30 µg                              | Rifampin 5 µg                               |
| Trimethoprim/Sulfamethoxazole 1.25/23.75 µg | Trimethoprim/Sulfamethoxazole 1.25/23.75 µg |
| Ciprofloxacin 5 µg                          | Cefazolin 30 µg                             |
| Chloramphenicol 30 µg                       | Chloramphenicol 30 µg                       |
| Streptomycin 10 µg                          |                                             |
| Tetracycline 30 µg                          |                                             |
| Piperacillin 100 µg                         |                                             |
| Ceftazidime/ Clavulanic acid 30/10 µg       |                                             |
| Kanamycin 30 µg                             |                                             |
